# Supplementary material for: Pan-Cancer Analysis Reveals Recurrent BCAR4 Gene Fusions across Solid Tumors
Source: Oxford University Press journal article supplement (doi:10.1158/1541-7786.mcr-21-0775), 2022-06-16
Supplement: mcr-21-0775_supptabls.xlsx [file mcr-21-0775_supptabls.xlsx]

## Sheet: Supplementary Table 1
Supplementary Table 1 |Summary of TCGA cohorts and sample sizes.
Cohort	Cancer Type	Tumors with RNA-Seq	Matched Normals with RNA-Seq
ACC	Adrenocortical carcinoma	79	0
BLCA	Bladder Urothelial Carcinoma	408	19
BRCA	Breast Invasive Carcinoma	1092	113
CESC	Cervical squamous cell carcinoma and endocervical adenocarcinoma	303	3
CHOL	Cholangiocarcinoma	36	9
CRC	Colon Adenocarcinoma (COAD) and Rectum Adenocarcinoma (READ)	387	51
DLBC	Lymphoid Neoplasm Diffuse Large B-cell Lymphoma	48	0
ESCA	Esophageal carcinoma	164	10
GBM	Glioblastoma multiforme	166	5
HNSC	Head and Neck squamous cell carcinoma	501	44
KIRH	Kidney Chromophobe	66	24
KIRC	Kidney Renal Cell Carcinoma	530	72
KIRP	Kidney renal papillary cell carcinoma	289	32
LAML	Acute Myeloid Leukemia	151	0
LGG	Brain Lower Grade Glioma	512	0
LIHC	Liver hepatocellular carcinoma	371	50
LUAD	Lung Adenocarcinoma	515	59
LUSC	Lung squamous cell carcinoma	501	49
MESO	Mesothelioma	86	0
OV	Ovarian serous cystadenocarcinoma	376	0
PAAD	Pancreatic adenocarcinoma	177	4
PCPG	Pheochromocytoma and Paraganglioma	179	3
PRAD	Prostate adenocarcinoma	496	52
SARC	Sarcoma	259	2
SKCM	Skin Cutaneous Melanoma	468	1
STAD	Stomach adenocarcinoma	378	32
TGCT	Testicular Germ Cell Tumors	150	0
THCA	Thyroid carcinoma	502	58
THYM	Thymoma	119	2
UCEC	Uterine Corpus Endometrial Carcinoma	194	24
UCS	Uterine Carcinosarcoma	56	0
UVM	Uveal Melanoma	79	0
Total		9638	349

## Sheet: Supplementary Table 2
Supplementary Table 3| siRNA and primer sequence
siRNA name	5'3' Forward	5'3' Reverse
Fusion siRNA 1	GACUAGGAGUGAUACGAAA	UUUCGUAUCACUCCUAGUC
Fusion siRNA 2	CGCUGUAGUUGUACAUUGA	UCAAUGUACAACUACAGCC
Primers
Gene	Forward Primer	Reverse Primer
RPL32	AGGCATTGACAACAGGGTTC	GTTGCACATCAGCAGCACTT
LITAF-BCAR4	CGAGAGGCCAGCTCAGAC	TCAGAGCAAGACAAGCATCG
ZC3HTA-BCAR4	GCTAACCGAGGGAGAGCTG	GGAACTCCCGTCTTCTGGAT
U1	GGGAGATACCATGATCACGAAGGT	CCACAAATTATGCAGTCGAGTTTCCC
MALAT1	GACGGAGGTTGAGATGAAGC	ATTCGGGGCTCTGTAGTCCT
ACTIN	CTCGACACCAGGGCGTTATG	CCACTCCATGCTCGATAGGAT

## Sheet: Supplementary Table 3
Supplementary Table 3| Proteomic variable and fixed modifications to label protein
Protocol	Modification(s)
TMT	fixed Cystine carbamidomethylation (+57.0215
	fixed Lysine TMT labeling (+229.1629)
	variable Methionine oxidation (+15.9949)
	variable N-terminal protein acetylation (+42.0106)
	variable TMT labeling of peptide N terminus and serine residues
iTRAQ	fixed Cysteine carbamidomethylation (+57.0215)
	fixed iTRAQ labeling of lysine (+144.10253)
	fixed peptide N terminus
	variable Methionine oxidation (+15.9949)

## Sheet: Supplementary Table 4
Suuplementary Table 4| Peptide Spectrum Matches from PepQuery
Peptide	Modification	Spectrum_title	Charge	exp_mass	ppm	pep_mass	mz	Score	pvalue	Cancer
MYQPIQTYPWMNLSRR	TMT 10-plex of peptide N-term@0[229.1629];Oxidation of M@11[15.9949]	13CPTAC_UCEC_W_PNNL_20180503_B4S1_f06:39892:3	3	2328.19	-8.1632	2328.17	777.071	20.6733	0.00899101	UCEC
MYQPIQTYPWMNLSR	TMT 10-plex of peptide N-term@0[229.1629];Oxidation of M@1[15.9949];Oxidation of M@11[15.9949]	15CPTAC_UCEC_W_PNNL_20180503_B4S3_f16:16238:4	4	2188.08	-6.05556	2188.06	548.027	20.1133	0.00999001	UCEC
MYQPIQTYPWMNLSR	TMT 10-plex of peptide N-term@0[229.1629]	06CPTAC_UCEC_W_PNNL_20170922_B2S2_f04:22881:3	3	2156.07	2.16086	2156.07	719.697	15.2801	0.00699301	UCEC
KSGSLQGTTEPSMTHSIIASTSL	TMT 10-plex of peptide N-term@0[229.1629];TMT 10-plex of K@1[229.1629];Oxidation of M@13[15.9949]	05CPTAC_UCEC_W_PNNL_20170922_B2S1_f17:41692:3	3	2806.49	-2.57437	2806.48	936.503	14.716	0.001998	UCEC
KSGSLQGTTEPSMTHSIIASTSL	TMT 10-plex of peptide N-term@0[229.1629];TMT 10-plex of K@1[229.1629];Oxidation of M@13[15.9949]	03CPTAC_UCEC_W_PNNL_20170922_B1S3_f17:40235:3	3	2806.5	-8.51155	2806.48	936.508	14.7105	0.002997	UCEC
KSGSLQGTTEPSMTHSIIASTSL	TMT 10-plex of peptide N-term@0[229.1629];TMT 10-plex of K@1[229.1629];Oxidation of M@13[15.9949]	02CPTAC_UCEC_W_PNNL_20170922_B1S2_f17:39784:3	3	2806.48	-1.98717	2806.48	936.502	14.6844	0.002997	UCEC
KSGSLQGTTEPSMTHSIIASTSL	TMT 10-plex of peptide N-term@0[229.1629];TMT 10-plex of K@1[229.1629];Oxidation of M@13[15.9949]	01CPTAC_UCEC_W_PNNL_20170922_B1S1_f17:39984:3	3	2806.48	-1.7262	2806.48	936.502	14.6606	0.002997	UCEC
MYQPIQTYPWMNLSRR	TMT 10-plex of peptide N-term@0[229.1629]	14CPTAC_UCEC_W_PNNL_20180503_B4S2_f24:33490:4	4	2312.2	-9.02382	2312.18	579.057	14.6254	0.003996	UCEC
KSGSLQGTTEPSMTHSIIASTSL	TMT 10-plex of peptide N-term@0[229.1629];TMT 10-plex of K@1[229.1629];Oxidation of M@13[15.9949]	08CPTAC_UCEC_W_PNNL_20170922_B2S4_f16:40542:3	3	2806.48	-0.29083	2806.48	936.5	14.5293	0.000999	UCEC
MYQPIQTYPWMNLSR	TMT 10-plex of peptide N-term@0[229.1629];Oxidation of M@1[15.9949]	05CPTAC_UCEC_W_PNNL_20170922_B2S1_f12:43057:2	2	2172.07	0.781071	2172.07	1087.04	13.9586	0.001998	UCEC
MYQPIQTYPWMNLSR	TMT 10-plex of peptide N-term@0[229.1629]	10CPTAC_UCEC_W_PNNL_20180222_B3S2_f23:25040:3	3	2156.07	2.24578	2156.07	719.697	13.7629	0.00699301	UCEC
KSGSLQGTTEPSMTHSIIASTSL	TMT 10-plex of peptide N-term@0[229.1629];TMT 10-plex of K@1[229.1629];Oxidation of M@13[15.9949]	08CPTAC_UCEC_W_PNNL_20170922_B2S4_f17:41363:3	3	2806.49	-4.46644	2806.48	936.504	13.6107	0.000999	UCEC
MYQPIQTYPWMNLSR	TMT 10-plex of peptide N-term@0[229.1629]	04CPTAC_UCEC_W_PNNL_20170922_B1S4_f09:32223:4	4	2156.07	2.19533	2156.07	540.025	13.4721	0.00999001	UCEC
KSGSLQGTTEPSMTHSIIASTSL	TMT 10-plex of peptide N-term@0[229.1629];TMT 10-plex of K@1[229.1629]	06CPTAC_UCEC_W_PNNL_20170922_B2S2_f05:20045:4	4	2790.48	1.77526	2790.48	698.627	13.0175	0.00999001	UCEC
KSGSLQGTTEPSMTHSIIASTSL	TMT 10-plex of peptide N-term@0[229.1629];TMT 10-plex of K@1[229.1629]	17CPTAC_UCEC_W_PNNL_20181015_B5S1_f12:35126:3	3	2790.47	3.21409	2790.48	931.166	12.5142	0.00999001	UCEC
KSGSLQGTTEPSMTHSIIASTSL	TMT 10-plex of peptide N-term@0[229.1629];TMT 10-plex of K@1[229.1629]	05CPTAC_UCEC_W_PNNL_20170922_B2S1_f12:40137:3	3	2790.47	3.80465	2790.48	931.165	12.4578	0.00999001	UCEC
KSGSLQGTTEPSMTHSIIASTSL	TMT 10-plex of peptide N-term@0[229.1629];TMT 10-plex of K@1[229.1629];Oxidation of M@13[15.9949]	09CPTAC_UCEC_W_PNNL_20180222_B3S1_f16:39914:3	3	2806.48	-0.878025	2806.48	936.501	12.3425	0.00699301	UCEC
KSGSLQGTTEPSMTHSIIASTSL	TMT 10-plex of peptide N-term@0[229.1629];TMT 10-plex of K@1[229.1629];Oxidation of M@13[15.9949]	10CPTAC_UCEC_W_PNNL_20180222_B3S2_f16:39729:3	3	2806.49	-3.29205	2806.48	936.503	12.0678	0.00799201	UCEC
MYQPIQTYPWMNLSR	TMT 10-plex of peptide N-term@0[229.1629];Oxidation of M@1[15.9949];Oxidation of M@11[15.9949]	15CPTAC_LUAD_W_BI_20180714_KL_f19:16534:4	4	2188.09	-9.62607	2188.06	548.029	19.7762	0.00599401	LUAD
MYQPIQTYPWMNLSRR	TMT 10-plex of peptide N-term@0[229.1629]	23CPTAC_LUAD_W_BI_20180822_KR_f08:11639:3	3	2312.18	0.130287	2312.18	771.733	18.7275	0.00899101	LUAD
MYQPIQTYPWMNLSR	TMT 10-plex of peptide N-term@0[229.1629];Oxidation of M@1[15.9949];Oxidation of M@11[15.9949]	22CPTAC_LUAD_W_BI_20180820_KR_f20:18029:4	4	2188.08	-6.27872	2188.06	548.027	17.5772	0.00999001	LUAD
MYQPIQTYPWMNLSRR	TMT 10-plex of peptide N-term@0[229.1629];Oxidation of M@1[15.9949];Oxidation of M@11[15.9949]	20CPTAC_LUAD_W_BI_20180809_KR_f01:42299:4	4	2344.15	8.83998	2344.17	587.044	17.5524	0.00899101	LUAD
KSGSLQGTTEPSMTHSIIASTSL	TMT 10-plex of peptide N-term@0[229.1629];TMT 10-plex of K@1[229.1629];Oxidation of M@13[15.9949]	18CPTAC_LUAD_W_BI_20180726_KL_f19:37596:3	3	2806.5	-6.81521	2806.48	936.507	17.4813	0.000999	LUAD
KSGSLQGTTEPSMTHSIIASTSL	TMT 10-plex of peptide N-term@0[229.1629];TMT 10-plex of K@1[229.1629];Oxidation of M@13[15.9949]	23CPTAC_LUAD_W_BI_20180822_KR_f19:32708:3	3	2806.49	-4.59692	2806.48	936.505	17.4746	0.000999	LUAD
KSGSLQGTTEPSMTHSIIASTSL	TMT 10-plex of peptide N-term@0[229.1629];TMT 10-plex of K@1[229.1629];Oxidation of M@13[15.9949]	19CPTAC_LUAD_W_BI_20180730_KL_f19:34556:3	3	2806.49	-5.57558	2806.48	936.505	17.4101	0.000999	LUAD
MYQPIQTYPWMNLSRR	TMT 10-plex of peptide N-term@0[229.1629];Oxidation of M@11[15.9949]	18CPTAC_LUAD_W_BI_20180726_KL_f08:38624:3	3	2328.19	-8.87103	2328.17	777.071	17.327	0.00799201	LUAD
MYQPIQTYPWMNLSR	TMT 10-plex of peptide N-term@0[229.1629]	02CPTAC_LUAD_W_BI_20180518_KR_f19:17455:3	3	2156.09	-5.7372	2156.07	719.703	16.5249	0.003996	LUAD
MYQPIQTYPWMNLSR	TMT 10-plex of peptide N-term@0[229.1629]	05CPTAC_LUAD_W_BI_20180527_KR_f02:34310:3	3	2156.09	-6.67138	2156.07	719.704	15.6477	0.002997	LUAD
MYQPIQTYPWMNLSRR	TMT 10-plex of peptide N-term@0[229.1629];Oxidation of M@11[15.9949]	04CPTAC_LUAD_W_BI_20180524_KR_f19:37406:3	3	2328.15	7.33041	2328.17	777.059	15.2742	0.000999	LUAD
KSGSLQGTTEPSMTHSIIASTSL	TMT 10-plex of peptide N-term@0[229.1629];TMT 10-plex of K@1[229.1629];Oxidation of M@13[15.9949]	22CPTAC_LUAD_W_BI_20180820_KR_f20:35166:3	3	2806.48	-0.160343	2806.48	936.5	14.6667	0.000999	LUAD
KSGSLQGTTEPSMTHSIIASTSL	TMT 10-plex of peptide N-term@0[229.1629];TMT 10-plex of K@1[229.1629];Oxidation of M@13[15.9949]	07CPTAC_LUAD_W_BI_20180602_KR_f20:33243:3	3	2806.48	-1.07376	2806.48	936.501	14.6457	0.002997	LUAD
KSGSLQGTTEPSMTHSIIASTSL	TMT 10-plex of peptide N-term@0[229.1629];TMT 10-plex of K@1[229.1629];Oxidation of M@13[15.9949]	25CPTAC_LUAD_W_BI_20180901_KR_f21:32863:3	3	2806.49	-4.79266	2806.48	936.505	14.6332	0.001998	LUAD
KSGSLQGTTEPSMTHSIIASTSL	TMT 10-plex of peptide N-term@0[229.1629];TMT 10-plex of K@1[229.1629];Oxidation of M@13[15.9949]	12CPTAC_LUAD_W_BI_20180912_KL_f20:34890:3	3	2806.47	2.77563	2806.48	936.498	14.6294	0.000999	LUAD
MYQPIQTYPWMNLSR	TMT 10-plex of peptide N-term@0[229.1629]	14CPTAC_LUAD_W_BI_20180711_KL_f23:42437:3	3	2156.07	3.17996	2156.07	719.697	14.6277	0.00699301	LUAD
KSGSLQGTTEPSMTHSIIASTSL	TMT 10-plex of peptide N-term@0[229.1629];TMT 10-plex of K@1[229.1629];Oxidation of M@13[15.9949]	06CPTAC_LUAD_W_BI_20180530_KR_f22:33024:3	3	2806.48	-2.1829	2806.48	936.502	14.6267	0.002997	LUAD
KSGSLQGTTEPSMTHSIIASTSL	TMT 10-plex of peptide N-term@0[229.1629];TMT 10-plex of K@1[229.1629];Oxidation of M@13[15.9949]	01CPTAC_LUAD_W_BI_20180515_KR_f20:32991:3	3	2806.5	-6.9457	2806.48	936.507	14.626	0.000999	LUAD
KSGSLQGTTEPSMTHSIIASTSL	TMT 10-plex of peptide N-term@0[229.1629];TMT 10-plex of K@1[229.1629];Oxidation of M@13[15.9949]	02CPTAC_LUAD_W_BI_20180518_KR_f20:33028:3	3	2806.49	-2.24815	2806.48	936.502	14.62	0.001998	LUAD
KSGSLQGTTEPSMTHSIIASTSL	TMT 10-plex of peptide N-term@0[229.1629];TMT 10-plex of K@1[229.1629];Oxidation of M@13[15.9949]	15CPTAC_LUAD_W_BI_20180714_KL_f19:36783:3	3	2806.5	-7.27192	2806.48	936.507	14.5694	0.002997	LUAD
KSGSLQGTTEPSMTHSIIASTSL	TMT 10-plex of peptide N-term@0[229.1629];TMT 10-plex of K@1[229.1629];Oxidation of M@13[15.9949]	12CPTAC_LUAD_W_BI_20180912_KL_f21:35032:3	3	2806.48	-1.26949	2806.48	936.501	14.5597	0.001998	LUAD
KSGSLQGTTEPSMTHSIIASTSL	TMT 10-plex of peptide N-term@0[229.1629];TMT 10-plex of K@1[229.1629];Oxidation of M@13[15.9949]	09CPTAC_LUAD_W_BI_20180620_KR_f22:37641:3	3	2806.49	-4.33595	2806.48	936.504	14.5555	0.002997	LUAD
KSGSLQGTTEPSMTHSIIASTSL	TMT 10-plex of peptide N-term@0[229.1629];TMT 10-plex of K@1[229.1629];Oxidation of M@13[15.9949]	11CPTAC_LUAD_W_BI_20180905_KR_f21:33179:3	3	2806.49	-5.44509	2806.48	936.505	14.5484	0.001998	LUAD
MYQPIQTYPWMNLSR	TMT 10-plex of peptide N-term@0[229.1629]	09CPTAC_LUAD_W_BI_20180620_KR_f01:44535:3	3	2156.06	6.40713	2156.07	719.694	14.2615	0.00799201	LUAD
KSGSLQGTTEPSMTHSIIASTSL	TMT 10-plex of peptide N-term@0[229.1629];TMT 10-plex of K@1[229.1629]	02CPTAC_LUAD_W_BI_20180518_KR_f16:31970:3	3	2790.47	3.21409	2790.48	931.166	14.0498	0.001998	LUAD
KSGSLQGTTEPSMTHSIIASTSL	TMT 10-plex of peptide N-term@0[229.1629];TMT 10-plex of K@1[229.1629];Oxidation of M@13[15.9949]	20CPTAC_LUAD_W_BI_20180809_KR_f19:33756:3	3	2806.5	-6.81521	2806.48	936.507	13.7737	0.000999	LUAD
MYQPIQTYPWMNLSR	TMT 10-plex of peptide N-term@0[229.1629];Oxidation of M@1[15.9949]	22CPTAC_LUAD_W_BI_20180820_KR_f08:5175:3	3	2172.08	-4.21461	2172.07	725.034	13.66	0.00599401	LUAD
MYQPIQTYPWMNLSRR	TMT 10-plex of peptide N-term@0[229.1629];Oxidation of M@11[15.9949]	04CPTAC_LUAD_W_BI_20180524_KR_f07:21798:3	3	2328.19	-6.27565	2328.17	777.069	13.537	0.003996	LUAD
SGSLQGTTEPSMTHSIIASTSL	TMT 10-plex of peptide N-term@0[229.1629];Oxidation of M@12[15.9949]	12CPTAC_LUAD_W_BI_20180912_KL_f08:34207:3	3	2449.23	-5.15168	2449.22	817.418	13.4714	0.00499501	LUAD
MYQPIQTYPWMNLSRR	iTRAQ 4-plex of peptide N-term@0[144.1021];Oxidation of M@1[15.9949]	TCGA_C8-A138_E2-A154_BH-A0BZ_117C_W_BI_20130225_H-PM_f23:32999:3	3	2243.11	0.881806	2243.11	748.71	24.8757	0.000999	BRCA
MYQPIQTYPWMNLSR	iTRAQ 4-plex of peptide N-term@0[144.1021];iTRAQ 4-plex of Y@2[144.1021]	TCGA_AR-A0TT_AR-A1AQ_AO-A12B_117C_W_BI_20131022_H-PM_f11:18656:3	3	2215.12	-0.896221	2215.12	739.38	22.563	0.000999	BRCA
MYQPIQTYPWMNLSRR	iTRAQ 4-plex of peptide N-term@0[144.1021];Oxidation of M@11[15.9949]	TCGA_A8-A09I_C8-A12L_A2-A0EX_117C_W_BI_20130302_H-PM_f24:32350:3	3	2243.11	0.881806	2243.11	748.71	21.3171	0.003996	BRCA
MYQPIQTYPWMNLSRR	iTRAQ 4-plex of peptide N-term@0[144.1021];Oxidation of M@11[15.9949]	TCGA_AO-A12D_AN-A04A_BH-A0AV_117C_W_BI_20130310_H-PM_f23:31122:3	3	2243.11	0.881806	2243.11	748.71	21.3119	0.001998	BRCA
MYQPIQTYPWMNLSRR	iTRAQ 4-plex of peptide N-term@0[144.1021];Oxidation of M@1[15.9949];iTRAQ 4-plex of Y@8[144.1021];Oxidation of M@11[15.9949]	TCGA_AO-A0JM_C8-A12V_A8-A08G_117C_W_BI_20130927_H-PM_f03:26958:3	3	2403.19	7.88739	2403.21	802.07	20.9534	0.000999	BRCA
MYQPIQTYPWMNLSR	iTRAQ 4-plex of peptide N-term@0[144.1021];iTRAQ 4-plex of Y@2[144.1021];iTRAQ 4-plex of Y@8[144.1021];Oxidation of M@11[15.9949]	TCGA_AR-A0TR_AO-A03O_BH-A18R_117C_W_BI_20130825_H-PM_f22:32391:3	3	2375.2	6.31177	2375.21	792.74	20.4059	0.000999	BRCA
MYQPIQTYPWMNLSR	iTRAQ 4-plex of peptide N-term@0[144.1021];iTRAQ 4-plex of Y@2[144.1021]	TCGA_A8-A06Z_A2-A0D1_A2-A0CM_117C_W_BI_20130401_H-JQ_f24:6308:4	4	2215.13	-6.64018	2215.12	554.79	20.3298	0.000999	BRCA
MYQPIQTYPWMNLSRR	iTRAQ 4-plex of peptide N-term@0[144.1021];Oxidation of M@1[15.9949];iTRAQ 4-plex of Y@2[144.1021]	TCGA_A7-A0CD_C8-A12W_AN-A0AL_117C_W_BI_20130913_H-PM_f14_130917083211:25675:3	3	2387.23	-6.68545	2387.21	796.75	19.7093	0.00599401	BRCA
MYQPIQTYPWMNLSRR	iTRAQ 4-plex of peptide N-term@0[144.1021];Oxidation of M@1[15.9949];iTRAQ 4-plex of Y@2[144.1021];Oxidation of M@11[15.9949]	TCGA_BH-A18U_A2-A0YI_A2-A0EQ_117C_W_BI_20130405_H-JQ_f03:25191:3	3	2403.19	7.88739	2403.21	802.07	18.7053	0.001998	BRCA
MYQPIQTYPWMNLSR	iTRAQ 4-plex of peptide N-term@0[144.1021];Oxidation of M@1[15.9949]	TCGA_E2-A10A_BH-A18Q_C8-A130_117C_W_BI_20130222_H-PM_f20:37936:3	3	2087.02	-4.37614	2087.01	696.68	18.1808	0.003996	BRCA
MYQPIQTYPWMNLSRR	iTRAQ 4-plex of peptide N-term@0[144.1021];Oxidation of M@11[15.9949]	TCGA_A8-A09G_C8-A131_C8-A134_117C_W_BI_20131011_H-PM_f23:31631:3	3	2243.11	0.881806	2243.11	748.71	18.126	0.002997	BRCA
MYQPIQTYPWMNLSRR	iTRAQ 4-plex of peptide N-term@0[144.1021];Oxidation of M@11[15.9949]	TCGA_A2-A0YG_E2-A150_BH-A18N_117C_W_BI_20130912_H-PM_f23:27811:3	3	2243.11	0.881806	2243.11	748.71	18.0591	0.00699301	BRCA
MYQPIQTYPWMNLSRR	iTRAQ 4-plex of peptide N-term@0[144.1021];Oxidation of M@1[15.9949];iTRAQ 4-plex of Y@8[144.1021];Oxidation of M@11[15.9949]	TCGA_A2-A0T6_E2-A158_E2-A15A_117C_W_BI_20130918_H-PM_f01:28292:3	3	2403.19	7.88739	2403.21	802.07	18.0505	0.00599401	BRCA
MYQPIQTYPWMNLSRR	iTRAQ 4-plex of peptide N-term@0[144.1021];Oxidation of M@1[15.9949]	TCGA_AR-A1AP_AN-A0FK_AO-A0J6_117C_W_BI_20130517_H-PM_f22:34062:3	3	2243.11	0.881806	2243.11	748.71	18.0448	0.00699301	BRCA
MYQPIQTYPWMNLSRR	iTRAQ 4-plex of peptide N-term@0[144.1021];Oxidation of M@1[15.9949]	TCGA_AO-A0JM_C8-A12V_A8-A08G_117C_W_BI_20130927_H-PM_f23:30748:3	3	2243.11	0.881806	2243.11	748.71	18.0367	0.00899101	BRCA
MYQPIQTYPWMNLSRR	iTRAQ 4-plex of peptide N-term@0[144.1021];Oxidation of M@1[15.9949];iTRAQ 4-plex of Y@8[144.1021];Oxidation of M@11[15.9949]	TCGA_A2-A0YG_E2-A150_BH-A18N_117C_W_BI_20130912_H-PM_f03:25837:3	3	2403.19	7.88739	2403.21	802.07	17.9719	0.003996	BRCA
MYQPIQTYPWMNLSRR	iTRAQ 4-plex of peptide N-term@0[144.1021];Oxidation of M@1[15.9949];iTRAQ 4-plex of Y@8[144.1021];Oxidation of M@11[15.9949]	TCGA_AR-A0TT_AR-A1AQ_AO-A12B_117C_W_BI_20131022_H-PM_f04:28170:3	3	2403.19	7.88739	2403.21	802.07	17.8781	0.00499501	BRCA
MYQPIQTYPWMNLSR	iTRAQ 4-plex of peptide N-term@0[144.1021];Oxidation of M@1[15.9949];iTRAQ 4-plex of Y@2[144.1021];iTRAQ 4-plex of Y@8[144.1021]	TCGA_A2-A0YF_BH-A0DD_BH-A0E9_117C_W_BI_20131018_H-PM_f19:35729:3	3	2375.2	6.31177	2375.21	792.74	17.8008	0.000999	BRCA
MYQPIQTYPWMNLSR	iTRAQ 4-plex of peptide N-term@0[144.1021];Oxidation of M@1[15.9949];iTRAQ 4-plex of Y@2[144.1021];iTRAQ 4-plex of Y@8[144.1021]	TCGA_A2-A0D2_C8-A12U_AR-A1AS_117C_W_BI_20131010_H-PM_f20:37261:3	3	2375.2	6.31177	2375.21	792.74	17.6826	0.002997	BRCA
MYQPIQTYPWMNLSR	iTRAQ 4-plex of peptide N-term@0[144.1021];Oxidation of M@1[15.9949]	TCGA_AO-A0JE_A2-A0T2_AN-A0AJ_117C_W_BI_20130802_H-PM_f20:38643:3	3	2087.02	-4.37614	2087.01	696.68	17.3302	0.003996	BRCA
MYQPIQTYPWMNLSR	iTRAQ 4-plex of peptide N-term@0[144.1021];Oxidation of M@1[15.9949]	TCGA_A7-A0CJ_AO-A12F_A2-A0YL_117C_W_BI_20130805_H-PM_f20:37564:3	3	2087.02	-4.37614	2087.01	696.68	17.3264	0.001998	BRCA
MYQPIQTYPWMNLSR	iTRAQ 4-plex of peptide N-term@0[144.1021];Oxidation of M@1[15.9949]	TCGA_A2-A0T6_E2-A158_E2-A15A_117C_W_BI_20130918_H-PM_f20:35857:3	3	2087.02	-4.37614	2087.01	696.68	17.3096	0.001998	BRCA
MYQPIQTYPWMNLSR	iTRAQ 4-plex of peptide N-term@0[144.1021];Oxidation of M@1[15.9949]	TCGA_AN-A0FL_BH-A0DG_AN-A0AS_117C_W_BI_20130726_H-PM_f19:34822:3	3	2087.02	-4.37614	2087.01	696.68	17.2944	0.00499501	BRCA
MYQPIQTYPWMNLSR	iTRAQ 4-plex of peptide N-term@0[144.1021];iTRAQ 4-plex of Y@2[144.1021];Oxidation of M@11[15.9949]	TCGA_AO-A12E_A8-A06N_A2-A0T1_117C_W_BI_20130909_H-PM_f24:6484:4	4	2231.13	-8.87188	2231.11	558.79	17.2701	0.001998	BRCA
MYQPIQTYPWMNLSR	iTRAQ 4-plex of peptide N-term@0[144.1021];Oxidation of M@1[15.9949]	TCGA_C8-A12P_BH-A0C1_A2-A0EY_117C_W_BI_20130622_H-PM_f18:34865:3	3	2087.02	-4.37614	2087.01	696.68	17.1168	0.001998	BRCA
SGSLQGTTEPSMTHSIIASTSL	iTRAQ 4-plex of peptide N-term@0[144.1021]	TCGA_AO-A12D_C8-A131_AO-A12B_117C_W_BI_20130208_H-PM_f04:5856:5	5	2348.16	0.648202	2348.17	470.64	17.1142	0.00999001	BRCA
MYQPIQTYPWMNLSRR	iTRAQ 4-plex of peptide N-term@0[144.1021];Oxidation of M@1[15.9949];iTRAQ 4-plex of Y@2[144.1021]	TCGA_AR-A0TR_AO-A03O_BH-A18R_117C_W_BI_20130825_H-PM_f24:25366:3	3	2387.2	5.88151	2387.21	796.74	17.1064	0.001998	BRCA
MYQPIQTYPWMNLSR	iTRAQ 4-plex of peptide N-term@0[144.1021];Oxidation of M@1[15.9949]	TCGA_E2-A159_A2-A0T3_A2-A0YD_117C_W_BI_20130823_H-PM_f19:38057:3	3	2087.02	-4.37614	2087.01	696.68	17.0521	0.002997	BRCA
MYQPIQTYPWMNLSR	iTRAQ 4-plex of peptide N-term@0[144.1021];iTRAQ 4-plex of Y@2[144.1021]	TCGA_AO-A0JM_C8-A12V_A8-A08G_117C_W_BI_20130927_H-PM_f24:6719:4	4	2215.13	-6.64018	2215.12	554.79	17.0499	0.003996	BRCA
MYQPIQTYPWMNLSR	iTRAQ 4-plex of peptide N-term@0[144.1021];Oxidation of M@1[15.9949]	TCGA_A2-A0T7_C8-A12Q_A8-A079_117C_W_BI_20130820_H-PM_f19:37885:3	3	2087.02	-4.37614	2087.01	696.68	17.03	0.00499501	BRCA
MYQPIQTYPWMNLSR	iTRAQ 4-plex of peptide N-term@0[144.1021];Oxidation of M@1[15.9949]	TCGA_A2-A0D0_BH-A0HK_C8-A12T_117C_W_BI_20130326_H-JQ_f20:32127:3	3	2087.02	-4.37614	2087.01	696.68	16.9812	0.00699301	BRCA
MYQPIQTYPWMNLSR	iTRAQ 4-plex of peptide N-term@0[144.1021]	TCGA_D8-A13Y_A8-A076_AO-A126_117C_W_BI_20130617_H-PM_f09:42446:3	3	2071.03	-6.78298	2071.01	691.35	16.9251	0.000999	BRCA
MYQPIQTYPWMNLSR	iTRAQ 4-plex of peptide N-term@0[144.1021];Oxidation of M@1[15.9949]	TCGA_AO-A12D_C8-A131_AO-A12B_117C_W_BI_20130208_H-PM_f20:36958:3	3	2087.02	-4.37614	2087.01	696.68	16.837	0.00599401	BRCA
MYQPIQTYPWMNLSR	iTRAQ 4-plex of peptide N-term@0[144.1021];Oxidation of M@1[15.9949]	TCGA_C8-A138_E2-A154_BH-A0BZ_117C_W_BI_20130225_H-PM_f20:36784:3	3	2087.02	-4.37614	2087.01	696.68	16.8222	0.00499501	BRCA
MYQPIQTYPWMNLSR	iTRAQ 4-plex of peptide N-term@0[144.1021];Oxidation of M@1[15.9949]	TCGA_A7-A0CD_C8-A12W_AN-A0AL_117C_W_BI_20130913_H-PM_f19:36048:3	3	2087.02	-4.37614	2087.01	696.68	16.7927	0.003996	BRCA
MYQPIQTYPWMNLSR	iTRAQ 4-plex of peptide N-term@0[144.1021];iTRAQ 4-plex of Y@2[144.1021];iTRAQ 4-plex of Y@8[144.1021]	CPTAC_263d3f-I_blcdb9-I_c4155b-C_117C_W_BI_20140417_H-PM_f05:31072:3	3	2359.21	4.27141	2359.22	787.41	16.7673	0.00799201	BRCA
MYQPIQTYPWMNLSR	iTRAQ 4-plex of peptide N-term@0[144.1021];iTRAQ 4-plex of Y@2[144.1021]	TCGA_BH-A18U_A2-A0YI_A2-A0EQ_117C_W_BI_20130405_H-JQ_f07:31507:3	3	2215.12	-0.896221	2215.12	739.38	16.7649	0.001998	BRCA
MYQPIQTYPWMNLSR	iTRAQ 4-plex of peptide N-term@0[144.1021];iTRAQ 4-plex of Y@2[144.1021];iTRAQ 4-plex of Y@8[144.1021];Oxidation of M@11[15.9949]	TCGA_A2-A0T7_C8-A12Q_A8-A079_117C_W_BI_20130820_H-PM_f20:38900:3	3	2375.2	6.31177	2375.21	792.74	16.7479	0.003996	BRCA
MYQPIQTYPWMNLSR	iTRAQ 4-plex of peptide N-term@0[144.1021];iTRAQ 4-plex of Y@2[144.1021]	TCGA_BH-A18V_A7-A13F_BH-A0E1_117C_W_BI_20130520_H-PM_f12:7645:4	4	2215.13	-6.64018	2215.12	554.79	16.7315	0.000999	BRCA
MYQPIQTYPWMNLSR	iTRAQ 4-plex of peptide N-term@0[144.1021];Oxidation of M@11[15.9949]	TCGA_BH-A18U_A2-A0YI_A2-A0EQ_117C_W_BI_20130405_H-JQ_f19:32085:3	3	2087.02	-4.37614	2087.01	696.68	16.7274	0.003996	BRCA
MYQPIQTYPWMNLSR	iTRAQ 4-plex of peptide N-term@0[144.1021];Oxidation of M@1[15.9949]	TCGA_A8-A09I_C8-A12L_A2-A0EX_117C_W_BI_20130302_H-PM_f20:37086:3	3	2087.02	-4.37614	2087.01	696.68	16.7272	0.00699301	BRCA
MYQPIQTYPWMNLSR	iTRAQ 4-plex of peptide N-term@0[144.1021];Oxidation of M@1[15.9949]	TCGA_AO-A12D_AN-A04A_BH-A0AV_117C_W_BI_20130310_H-PM_f20:34513:3	3	2087.02	-4.37614	2087.01	696.68	16.7133	0.00499501	BRCA
MYQPIQTYPWMNLSR	iTRAQ 4-plex of peptide N-term@0[144.1021];Oxidation of M@1[15.9949]	TCGA_E2-A10A_BH-A18Q_C8-A130_117C_W_BI_20130222_H-PM_f19:38506:3	3	2087.02	-4.37614	2087.01	696.68	16.713	0.00599401	BRCA
MYQPIQTYPWMNLSR	iTRAQ 4-plex of peptide N-term@0[144.1021];iTRAQ 4-plex of Y@2[144.1021];iTRAQ 4-plex of Y@8[144.1021]	CPTAC_263d3f-I_blcdb9-I_c4155b-C_117C_W_BI_20140417_H-PM_f04:29813:3	3	2359.21	4.27141	2359.22	787.41	16.701	0.00499501	BRCA
MYQPIQTYPWMNLSR	iTRAQ 4-plex of peptide N-term@0[144.1021];Oxidation of M@1[15.9949];iTRAQ 4-plex of Y@2[144.1021];iTRAQ 4-plex of Y@8[144.1021]	CPTAC_263d3f-I_blcdb9-I_c4155b-C_117C_W_BI_20140417_H-PM_f15:30208:3	3	2375.2	6.31177	2375.21	792.74	16.6942	0.003996	BRCA
MYQPIQTYPWMNLSRR	iTRAQ 4-plex of peptide N-term@0[144.1021]	TCGA_AO-A12E_A8-A06N_A2-A0T1_117C_W_BI_20130909_H-PM_f05:29701:3	3	2227.12	-1.31858	2227.12	743.38	16.69	0.000999	BRCA
MYQPIQTYPWMNLSR	iTRAQ 4-plex of peptide N-term@0[144.1021]	TCGA_A7-A0CE_BH-A0C0_A2-A0YC_117C_W_BI_20130524_H-PM_f20:29894:3	3	2071.03	-6.78298	2071.01	691.35	16.673	0.00499501	BRCA
MYQPIQTYPWMNLSR	iTRAQ 4-plex of peptide N-term@0[144.1021];iTRAQ 4-plex of Y@2[144.1021];iTRAQ 4-plex of Y@8[144.1021]	CPTAC_263d3f-I_blcdb9-I_c4155b-C_117C_W_BI_20140417_H-PM_f14:31758:3	3	2359.21	4.27141	2359.22	787.41	16.6582	0.003996	BRCA
MYQPIQTYPWMNLSR	iTRAQ 4-plex of peptide N-term@0[144.1021];Oxidation of M@1[15.9949]	TCGA_AO-A12D_AN-A04A_BH-A0AV_117C_W_BI_20130310_H-PM_f19:35306:3	3	2087.02	-4.37614	2087.01	696.68	16.596	0.000999	BRCA
MYQPIQTYPWMNLSR	iTRAQ 4-plex of peptide N-term@0[144.1021];Oxidation of M@1[15.9949]	TCGA_C8-A138_E2-A154_BH-A0BZ_117C_W_BI_20130225_H-PM_f19:37778:3	3	2087.02	-4.37614	2087.01	696.68	16.4647	0.00599401	BRCA
MYQPIQTYPWMNLSRR	iTRAQ 4-plex of peptide N-term@0[144.1021]	TCGA_A2-A0T7_C8-A12Q_A8-A079_117C_W_BI_20130820_H-PM_f05:30266:3	3	2227.12	-1.31858	2227.12	743.38	16.4054	0.000999	BRCA
MYQPIQTYPWMNLSRR	iTRAQ 4-plex of peptide N-term@0[144.1021];Oxidation of M@1[15.9949];iTRAQ 4-plex of Y@2[144.1021];iTRAQ 4-plex of Y@8[144.1021]	CPTAC_263d3f-I_blcdb9-I_c4155b-C_117C_W_BI_20140417_H-PM_f01:20213:3	3	2531.32	-1.53958	2531.31	844.78	16.3123	0.001998	BRCA
MYQPIQTYPWMNLSR	iTRAQ 4-plex of peptide N-term@0[144.1021];Oxidation of M@1[15.9949];iTRAQ 4-plex of Y@2[144.1021];iTRAQ 4-plex of Y@8[144.1021]	TCGA_A2-A0YM_BH-A0C7_A2-A0SX_117C_W_BI_20131025_H-PM_f16:22452:3	3	2375.2	6.31177	2375.21	792.74	16.2444	0.001998	BRCA
MYQPIQTYPWMNLSRR	iTRAQ 4-plex of peptide N-term@0[144.1021];Oxidation of M@1[15.9949];iTRAQ 4-plex of Y@2[144.1021]	TCGA_A2-A0SW_AO-A0JL_BH-A0BV_117C_W_BI_20131024_H-PM_f14:19560:3	3	2387.23	-6.68545	2387.21	796.75	16.2246	0.002997	BRCA
SGSLQGTTEPSMTHSIIASTSL	iTRAQ 4-plex of peptide N-term@0[144.1021];Oxidation of M@12[15.9949]	TCGA_D8-A13Y_A8-A076_AO-A126_117C_W_BI_20130617_H-PM_f14:17026:3	3	2364.16	0.796804	2364.16	789.06	16.0648	0.001998	BRCA
MYQPIQTYPWMNLSR	iTRAQ 4-plex of peptide N-term@0[144.1021];iTRAQ 4-plex of Y@2[144.1021];iTRAQ 4-plex of Y@8[144.1021];Oxidation of M@11[15.9949]	TCGA_BH-A18U_A2-A0YI_A2-A0EQ_117C_W_BI_20130405_H-JQ_f16:18542:3	3	2375.2	6.31177	2375.21	792.74	15.9535	0.00499501	BRCA
SGSLQGTTEPSMTHSIIASTSL	iTRAQ 4-plex of peptide N-term@0[144.1021];Oxidation of M@12[15.9949]	TCGA_BH-A0EE_AO-A0J9_BH-A0E0_117C_W_BI_20130412_H-PM_f16:19019:4	4	2364.17	-4.58504	2364.16	592.05	15.9124	0.002997	BRCA
MYQPIQTYPWMNLSRR	iTRAQ 4-plex of peptide N-term@0[144.1021];Oxidation of M@1[15.9949];iTRAQ 4-plex of Y@2[144.1021]	TCGA_A7-A0CE_BH-A0C0_A2-A0YC_117C_W_BI_20130524_H-PM_f15:20335:4	4	2387.21	0.551638	2387.21	597.81	15.8424	0.00499501	BRCA
MYQPIQTYPWMNLSR	iTRAQ 4-plex of peptide N-term@0[144.1021]	TCGA_AR-A0TT_AR-A1AQ_AO-A12B_117C_W_BI_20131022_H-PM_f09:36167:3	3	2071.03	-6.78298	2071.01	691.35	15.8406	0.000999	BRCA
MYQPIQTYPWMNLSR	iTRAQ 4-plex of peptide N-term@0[144.1021];iTRAQ 4-plex of Y@2[144.1021]	TCGA_A7-A0CE_BH-A0C0_A2-A0YC_117C_W_BI_20130524_H-PM_f06:18392:3	3	2215.12	-0.896221	2215.12	739.38	15.7729	0.003996	BRCA
MYQPIQTYPWMNLSR	iTRAQ 4-plex of peptide N-term@0[144.1021];Oxidation of M@1[15.9949];iTRAQ 4-plex of Y@8[144.1021];Oxidation of M@11[15.9949]	TCGA_A8-A09G_C8-A131_C8-A134_117C_W_BI_20131011_H-PM_f09:24324:3	3	2247.13	-9.85979	2247.11	750.05	15.7542	0.002997	BRCA
KSGSLQGTTEPSMTHSIIASTSL	iTRAQ 4-plex of K@1[144.1021];iTRAQ 4-plex of peptide N-term@0[144.1021]	TCGA_D8-A13Y_A8-A076_AO-A126_117C_W_BI_20130617_H-PM_f03:32339:4	4	2620.37	-3.3312	2620.36	656.1	15.5038	0.003996	BRCA
MYQPIQTYPWMNLSRR	iTRAQ 4-plex of peptide N-term@0[144.1021];Oxidation of M@1[15.9949];iTRAQ 4-plex of Y@2[144.1021];iTRAQ 4-plex of Y@8[144.1021]	TCGA_A2-A0EV_AN-A0AM_D8-A142_117C_W_BI_20130625_H-PM_f11:39809:3	3	2531.32	-1.53958	2531.31	844.78	15.3883	0.000999	BRCA
MYQPIQTYPWMNLSRR	iTRAQ 4-plex of peptide N-term@0[144.1021]	TCGA_A7-A0CJ_AO-A12F_A2-A0YL_117C_W_BI_20130805_H-PM_f15:35639:3	3	2227.12	-1.31858	2227.12	743.38	15.2214	0.00999001	BRCA
MYQPIQTYPWMNLSRR	iTRAQ 4-plex of peptide N-term@0[144.1021];Oxidation of M@1[15.9949];iTRAQ 4-plex of Y@8[144.1021];Oxidation of M@11[15.9949]	TCGA_A8-A09I_C8-A12L_A2-A0EX_117C_W_BI_20130302_H-PM_f04:29362:3	3	2403.19	7.88739	2403.21	802.07	15.0099	0.003996	BRCA
KSGSLQGTTEPSMTHSIIASTSL	iTRAQ 4-plex of K@1[144.1021];iTRAQ 4-plex of peptide N-term@0[144.1021]	TCGA_E2-A159_A2-A0T3_A2-A0YD_117C_W_BI_20130823_H-PM_f14:38890:3	3	2620.39	-9.92436	2620.36	874.47	14.8871	0.00599401	BRCA
MYQPIQTYPWMNLSRR	iTRAQ 4-plex of peptide N-term@0[144.1021]	TCGA_A8-A09I_C8-A12L_A2-A0EX_117C_W_BI_20130302_H-PM_f09:38904:3	3	2227.12	-1.31858	2227.12	743.38	14.8031	0.00599401	BRCA
KSGSLQGTTEPSMTHSIIASTSL	iTRAQ 4-plex of K@1[144.1021];iTRAQ 4-plex of peptide N-term@0[144.1021]	TCGA_A8-A09I_C8-A12L_A2-A0EX_117C_W_BI_20130302_H-PM_f02:37693:4	4	2620.37	-3.3312	2620.36	656.1	14.7643	0.002997	BRCA
MYQPIQTYPWMNLSRR	iTRAQ 4-plex of peptide N-term@0[144.1021];Oxidation of M@1[15.9949];iTRAQ 4-plex of Y@2[144.1021];Oxidation of M@11[15.9949]	TCGA_A8-A06Z_A2-A0D1_A2-A0CM_117C_W_BI_20130401_H-JQ_f19:27106:3	3	2403.22	-4.59593	2403.21	802.08	14.7139	0.00899101	BRCA
MYQPIQTYPWMNLSRR	iTRAQ 4-plex of peptide N-term@0[144.1021]	TCGA_AO-A0JM_C8-A12V_A8-A08G_117C_W_BI_20130927_H-PM_f18:29383:3	3	2227.12	-1.31858	2227.12	743.38	14.6688	0.002997	BRCA
MYQPIQTYPWMNLSR	iTRAQ 4-plex of peptide N-term@0[144.1021];iTRAQ 4-plex of Y@2[144.1021];iTRAQ 4-plex of Y@8[144.1021]	CPTAC_263d3f-I_blcdb9-I_c4155b-C_117C_W_BI_20140417_H-PM_f01:30099:2	2	2359.21	5.42583	2359.22	1180.61	14.6441	0.000999	BRCA
MYQPIQTYPWMNLSR	iTRAQ 4-plex of peptide N-term@0[144.1021];Oxidation of M@1[15.9949];iTRAQ 4-plex of Y@2[144.1021];iTRAQ 4-plex of Y@8[144.1021]	TCGA_AR-A0TV_C8-A12Z_AO-A0JJ_117C_W_BI_20130730_H-PM_f15:37695:3	3	2375.23	-6.31867	2375.21	792.75	14.6378	0.002997	BRCA
MYQPIQTYPWMNLSR	iTRAQ 4-plex of peptide N-term@0[144.1021];Oxidation of M@1[15.9949];iTRAQ 4-plex of Y@2[144.1021];iTRAQ 4-plex of Y@8[144.1021]	CPTAC_263d3f-I_blcdb9-I_c4155b-C_117C_W_BI_20140417_H-PM_f14:36898:3	3	2375.23	-6.31867	2375.21	792.75	14.6278	0.002997	BRCA
MYQPIQTYPWMNLSR	iTRAQ 4-plex of peptide N-term@0[144.1021];Oxidation of M@1[15.9949];iTRAQ 4-plex of Y@2[144.1021];iTRAQ 4-plex of Y@8[144.1021]	TCGA_D8-A13Y_A8-A076_AO-A126_117C_W_BI_20130617_H-PM_f15:36800:3	3	2375.23	-6.31867	2375.21	792.75	14.6015	0.000999	BRCA
MYQPIQTYPWMNLSRR	iTRAQ 4-plex of peptide N-term@0[144.1021];Oxidation of M@1[15.9949];iTRAQ 4-plex of Y@2[144.1021];Oxidation of M@11[15.9949]	TCGA_A2-A0SW_AO-A0JL_BH-A0BV_117C_W_BI_20131024_H-PM_f19:23582:3	3	2403.22	-4.59593	2403.21	802.08	14.5901	0.003996	BRCA
MYQPIQTYPWMNLSR	iTRAQ 4-plex of peptide N-term@0[144.1021];Oxidation of M@1[15.9949];iTRAQ 4-plex of Y@2[144.1021];iTRAQ 4-plex of Y@8[144.1021]	TCGA_A7-A0CJ_AO-A12F_A2-A0YL_117C_W_BI_20130805_H-PM_f15:37121:3	3	2375.23	-6.31867	2375.21	792.75	14.5584	0.000999	BRCA
MYQPIQTYPWMNLSRR	iTRAQ 4-plex of peptide N-term@0[144.1021];Oxidation of M@1[15.9949];iTRAQ 4-plex of Y@2[144.1021];Oxidation of M@11[15.9949]	TCGA_A7-A0CD_C8-A12W_AN-A0AL_117C_W_BI_20130913_H-PM_f19:30242:3	3	2403.22	-4.59593	2403.21	802.08	14.5581	0.002997	BRCA
MYQPIQTYPWMNLSR	iTRAQ 4-plex of peptide N-term@0[144.1021];Oxidation of M@1[15.9949]	TCGA_AR-A0TT_AR-A1AQ_AO-A12B_117C_W_BI_20131022_H-PM_f20:34431:3	3	2087.02	-4.37614	2087.01	696.68	14.528	0.001998	BRCA
MYQPIQTYPWMNLSR	iTRAQ 4-plex of peptide N-term@0[144.1021];Oxidation of M@11[15.9949]	TCGA_AR-A0TR_AO-A03O_BH-A18R_117C_W_BI_20130825_H-PM_f03:6191:4	4	2087.01	-0.889583	2087.01	522.76	14.5181	0.00599401	BRCA
MYQPIQTYPWMNLSR	iTRAQ 4-plex of peptide N-term@0[144.1021];iTRAQ 4-plex of Y@2[144.1021];Oxidation of M@11[15.9949]	TCGA_AO-A0JM_C8-A12V_A8-A08G_117C_W_BI_20130927_H-PM_f24:6547:4	4	2231.13	-8.87188	2231.11	558.79	14.4271	0.00999001	BRCA
MYQPIQTYPWMNLSR	iTRAQ 4-plex of peptide N-term@0[144.1021];iTRAQ 4-plex of Y@2[144.1021];Oxidation of M@11[15.9949]	TCGA_AO-A12D_AN-A04A_BH-A0AV_117C_W_BI_20130310_H-PM_f24:5640:4	4	2231.13	-8.87188	2231.11	558.79	14.4128	0.00599401	BRCA
MYQPIQTYPWMNLSR	iTRAQ 4-plex of peptide N-term@0[144.1021];Oxidation of M@1[15.9949]	TCGA_A8-A06Z_A2-A0D1_A2-A0CM_117C_W_BI_20130401_H-JQ_f19:32145:3	3	2087.02	-4.37614	2087.01	696.68	14.4109	0.00699301	BRCA
MYQPIQTYPWMNLSR	iTRAQ 4-plex of peptide N-term@0[144.1021];iTRAQ 4-plex of Y@2[144.1021];Oxidation of M@11[15.9949]	TCGA_C8-A138_E2-A154_BH-A0BZ_117C_W_BI_20130225_H-PM_f24:6661:4	4	2231.13	-8.87188	2231.11	558.79	14.4029	0.00599401	BRCA
MYQPIQTYPWMNLSRR	iTRAQ 4-plex of peptide N-term@0[144.1021];iTRAQ 4-plex of Y@8[144.1021]	TCGA_A7-A0CD_C8-A12W_AN-A0AL_117C_W_BI_20130913_H-PM_f03:10929:3	3	2371.21	3.84857	2371.22	791.41	14.3817	0.00899101	BRCA
MYQPIQTYPWMNLSRR	iTRAQ 4-plex of peptide N-term@0[144.1021]	TCGA_A8-A09I_C8-A12L_A2-A0EX_117C_W_BI_20130302_H-PM_f19:26206:3	3	2227.12	-1.31858	2227.12	743.38	14.3476	0.00899101	BRCA
MYQPIQTYPWMNLSR	iTRAQ 4-plex of peptide N-term@0[144.1021];Oxidation of M@11[15.9949]	TCGA_AR-A0TT_AR-A1AQ_AO-A12B_117C_W_BI_20131022_H-PM_f20:34553:3	3	2087.02	-4.37614	2087.01	696.68	14.22	0.00499501	BRCA
MYQPIQTYPWMNLSR	iTRAQ 4-plex of peptide N-term@0[144.1021];Oxidation of M@1[15.9949]	TCGA_AR-A0TT_AR-A1AQ_AO-A12B_117C_W_BI_20131022_H-PM_f20:34469:2	2	2087.03	-7.86269	2087.01	1044.52	14.1356	0.001998	BRCA
MYQPIQTYPWMNLSRR	iTRAQ 4-plex of peptide N-term@0[144.1021];Oxidation of M@1[15.9949];iTRAQ 4-plex of Y@2[144.1021];Oxidation of M@11[15.9949]	CPTAC_263d3f-I_blcdb9-I_c4155b-C_117C_W_BI_20140417_H-PM_f11:24398:3	3	2403.19	7.88739	2403.21	802.07	14.1166	0.003996	BRCA
MYQPIQTYPWMNLSR	iTRAQ 4-plex of peptide N-term@0[144.1021];Oxidation of M@1[15.9949]	TCGA_AN-A0FL_BH-A0DG_AN-A0AS_117C_W_BI_20130726_H-PM_f19:34842:2	2	2087.03	-7.86269	2087.01	1044.52	14.1099	0.002997	BRCA
MYQPIQTYPWMNLSR	iTRAQ 4-plex of peptide N-term@0[144.1021];Oxidation of M@1[15.9949]	TCGA_BH-A0EE_AO-A0J9_BH-A0E0_117C_W_BI_20130412_H-PM_f20:37258:2	2	2087.03	-7.86269	2087.01	1044.52	14.1013	0.002997	BRCA
MYQPIQTYPWMNLSR	iTRAQ 4-plex of peptide N-term@0[144.1021];iTRAQ 4-plex of Y@2[144.1021]	TCGA_AO-A12D_AN-A04A_BH-A0AV_117C_W_BI_20130416_H-PM_f14:41266:3	3	2215.12	-0.896221	2215.12	739.38	14.0781	0.00699301	BRCA
MYQPIQTYPWMNLSR	iTRAQ 4-plex of peptide N-term@0[144.1021];Oxidation of M@1[15.9949]	TCGA_AO-A0JE_A2-A0T2_AN-A0AJ_117C_W_BI_20130802_H-PM_f19:38410:2	2	2087.03	-7.86269	2087.01	1044.52	14.0677	0.001998	BRCA
MYQPIQTYPWMNLSR	iTRAQ 4-plex of peptide N-term@0[144.1021];Oxidation of M@1[15.9949]	TCGA_D8-A13Y_A8-A076_AO-A126_117C_W_BI_20130617_H-PM_f19:37437:2	2	2087.03	-7.86269	2087.01	1044.52	14.067	0.000999	BRCA
MYQPIQTYPWMNLSRR	iTRAQ 4-plex of peptide N-term@0[144.1021];Oxidation of M@1[15.9949]	TCGA_AO-A0JC_A8-A08Z_AR-A0TX_117C_W_BI_20130527_H-PM_f23:30839:3	3	2243.11	0.881806	2243.11	748.71	14.0465	0.00699301	BRCA
MYQPIQTYPWMNLSR	iTRAQ 4-plex of peptide N-term@0[144.1021];Oxidation of M@1[15.9949]	TCGA_C8-A12P_BH-A0C1_A2-A0EY_117C_W_BI_20130622_H-PM_f18:34817:2	2	2087.03	-7.86269	2087.01	1044.52	14.0398	0.000999	BRCA
MYQPIQTYPWMNLSR	iTRAQ 4-plex of peptide N-term@0[144.1021];Oxidation of M@1[15.9949]	TCGA_A2-A0T7_C8-A12Q_A8-A079_117C_W_BI_20130820_H-PM_f19:37861:2	2	2087.03	-7.86269	2087.01	1044.52	14.0112	0.000999	BRCA
MYQPIQTYPWMNLSR	iTRAQ 4-plex of peptide N-term@0[144.1021];Oxidation of M@11[15.9949]	TCGA_A8-A09G_C8-A131_C8-A134_117C_W_BI_20131011_H-PM_f19:35762:3	3	2087.02	-4.37614	2087.01	696.68	14.0086	0.00899101	BRCA
MYQPIQTYPWMNLSR	iTRAQ 4-plex of peptide N-term@0[144.1021];Oxidation of M@11[15.9949]	TCGA_A2-A0YM_BH-A0C7_A2-A0SX_117C_W_BI_20131025_H-PM_f19:28223:3	3	2087.02	-4.37614	2087.01	696.68	13.9839	0.003996	BRCA
MYQPIQTYPWMNLSR	iTRAQ 4-plex of peptide N-term@0[144.1021];iTRAQ 4-plex of Y@2[144.1021];Oxidation of M@11[15.9949]	TCGA_E2-A10A_BH-A18Q_C8-A130_117C_W_BI_20130222_H-PM_f24:6726:4	4	2231.13	-8.87188	2231.11	558.79	13.9395	0.00499501	BRCA
MYQPIQTYPWMNLSR	iTRAQ 4-plex of peptide N-term@0[144.1021];Oxidation of M@1[15.9949]	TCGA_AO-A12D_AN-A04A_BH-A0AV_117C_W_BI_20130416_H-PM_f19:37719:3	3	2087.02	-4.37614	2087.01	696.68	13.9002	0.00499501	BRCA
MYQPIQTYPWMNLSR	iTRAQ 4-plex of peptide N-term@0[144.1021];Oxidation of M@1[15.9949]	TCGA_A2-A0D0_BH-A0HK_C8-A12T_117C_W_BI_20130326_H-JQ_f20:32142:2	2	2087.03	-7.86269	2087.01	1044.52	13.8966	0.000999	BRCA
MYQPIQTYPWMNLSR	iTRAQ 4-plex of peptide N-term@0[144.1021];Oxidation of M@1[15.9949]	TCGA_C8-A138_E2-A154_BH-A0BZ_117C_W_BI_20130225_H-PM_f20:36777:2	2	2087.03	-7.86269	2087.01	1044.52	13.8347	0.002997	BRCA
MYQPIQTYPWMNLSR	iTRAQ 4-plex of peptide N-term@0[144.1021];iTRAQ 4-plex of Y@2[144.1021];Oxidation of M@11[15.9949]	TCGA_E2-A10A_BH-A18Q_C8-A130_117C_W_BI_20130222_H-PM_f01:6326:4	4	2231.13	-8.87188	2231.11	558.79	13.7721	0.003996	BRCA
SGSLQGTTEPSMTHSIIASTSL	iTRAQ 4-plex of peptide N-term@0[144.1021];Oxidation of M@12[15.9949]	TCGA_AN-A0FL_BH-A0DG_AN-A0AS_117C_W_BI_20130726_H-PM_f02:5274:4	4	2364.17	-4.58504	2364.16	592.05	13.7496	0.000999	BRCA
MYQPIQTYPWMNLSR	iTRAQ 4-plex of peptide N-term@0[144.1021];iTRAQ 4-plex of Y@2[144.1021]	TCGA_A8-A09I_C8-A12L_A2-A0EX_117C_W_BI_20130302_H-PM_f24:6807:4	4	2215.13	-6.64018	2215.12	554.79	13.6548	0.00499501	BRCA
MYQPIQTYPWMNLSR	iTRAQ 4-plex of peptide N-term@0[144.1021];Oxidation of M@11[15.9949]	TCGA_A2-A0T7_C8-A12Q_A8-A079_117C_W_BI_20130820_H-PM_f03:6512:4	4	2087.01	-0.889583	2087.01	522.76	13.6431	0.001998	BRCA
MYQPIQTYPWMNLSR	iTRAQ 4-plex of peptide N-term@0[144.1021];Oxidation of M@1[15.9949]	TCGA_AO-A12D_AN-A04A_BH-A0AV_117C_W_BI_20130310_H-PM_f20:34519:2	2	2087.01	1.7204	2087.01	1044.51	13.5402	0.002997	BRCA
MYQPIQTYPWMNLSR	iTRAQ 4-plex of peptide N-term@0[144.1021];Oxidation of M@1[15.9949]	TCGA_AO-A12D_AN-A04A_BH-A0AV_117C_W_BI_20130310_H-PM_f19:35293:2	2	2087.03	-7.86269	2087.01	1044.52	13.5102	0.000999	BRCA
MYQPIQTYPWMNLSR	iTRAQ 4-plex of peptide N-term@0[144.1021];Oxidation of M@1[15.9949]	TCGA_E2-A10A_BH-A18Q_C8-A130_117C_W_BI_20130222_H-PM_f19:38508:2	2	2087.01	1.7204	2087.01	1044.51	13.4989	0.001998	BRCA
MYQPIQTYPWMNLSR	iTRAQ 4-plex of peptide N-term@0[144.1021];Oxidation of M@1[15.9949];iTRAQ 4-plex of Y@8[144.1021]	TCGA_AO-A12D_AN-A04A_BH-A0AV_117C_W_BI_20130416_H-PM_f23:16587:3	3	2231.11	1.31297	2231.11	744.71	13.4983	0.00899101	BRCA
SGSLQGTTEPSMTHSIIASTSL	iTRAQ 4-plex of peptide N-term@0[144.1021];Oxidation of M@12[15.9949]	TCGA_A2-A0T7_C8-A12Q_A8-A079_117C_W_BI_20130820_H-PM_f18:17728:4	4	2364.17	-4.58504	2364.16	592.05	13.4931	0.001998	BRCA
MYQPIQTYPWMNLSR	iTRAQ 4-plex of peptide N-term@0[144.1021];iTRAQ 4-plex of Y@2[144.1021];iTRAQ 4-plex of Y@8[144.1021]	TCGA_AO-A12E_A8-A06N_A2-A0T1_117C_W_BI_20130909_H-PM_f05:37703:3	3	2359.24	-8.44467	2359.22	787.42	13.4842	0.00799201	BRCA
MYQPIQTYPWMNLSR	iTRAQ 4-plex of peptide N-term@0[144.1021];iTRAQ 4-plex of Y@2[144.1021]	TCGA_A8-A09G_C8-A131_C8-A134_117C_W_BI_20131011_H-PM_f24:7519:3	3	2215.12	-0.896221	2215.12	739.38	13.4202	0.00799201	BRCA
MYQPIQTYPWMNLSR	iTRAQ 4-plex of peptide N-term@0[144.1021];iTRAQ 4-plex of Y@2[144.1021];iTRAQ 4-plex of Y@8[144.1021]	TCGA_AO-A12D_AN-A04A_BH-A0AV_117C_W_BI_20130416_H-PM_f22:29730:3	3	2359.21	4.27141	2359.22	787.41	13.126	0.00899101	BRCA
MYQPIQTYPWMNLSR	iTRAQ 4-plex of peptide N-term@0[144.1021];iTRAQ 4-plex of Y@2[144.1021];iTRAQ 4-plex of Y@8[144.1021]	TCGA_AR-A0TY_AR-A0U4_BH-A0HP_117C_W_BI_20130408_H-JQ_f17:25054:3	3	2359.21	4.27141	2359.22	787.41	12.98	0.00999001	BRCA
MYQPIQTYPWMNLSRR	iTRAQ 4-plex of peptide N-term@0[144.1021];Oxidation of M@1[15.9949];iTRAQ 4-plex of Y@2[144.1021];iTRAQ 4-plex of Y@8[144.1021]	TCGA_A2-A0YM_BH-A0C7_A2-A0SX_117C_W_BI_20131025_H-PM_f24:33487:3	3	2531.32	-1.53958	2531.31	844.78	12.9607	0.00499501	BRCA
MYQPIQTYPWMNLSR	iTRAQ 4-plex of peptide N-term@0[144.1021];iTRAQ 4-plex of Y@2[144.1021]	TCGA_C8-A12P_BH-A0C1_A2-A0EY_117C_W_BI_20130622_H-PM_f24:6060:3	3	2215.12	-0.896221	2215.12	739.38	12.9454	0.00699301	BRCA
MYQPIQTYPWMNLSRR	iTRAQ 4-plex of peptide N-term@0[144.1021];Oxidation of M@1[15.9949];iTRAQ 4-plex of Y@2[144.1021];iTRAQ 4-plex of Y@8[144.1021]	TCGA_D8-A13Y_A8-A076_AO-A126_117C_W_BI_20130617_H-PM_f23:43263:3	3	2531.32	-1.53958	2531.31	844.78	12.9438	0.003996	BRCA
MYQPIQTYPWMNLSR	iTRAQ 4-plex of peptide N-term@0[144.1021];iTRAQ 4-plex of Y@2[144.1021];Oxidation of M@11[15.9949]	TCGA_AR-A0TY_AR-A0U4_BH-A0HP_117C_W_BI_20130408_H-JQ_f24:6317:4	4	2231.13	-8.87188	2231.11	558.79	12.8085	0.00799201	BRCA
MYQPIQTYPWMNLSR	iTRAQ 4-plex of peptide N-term@0[144.1021];Oxidation of M@1[15.9949];iTRAQ 4-plex of Y@8[144.1021];Oxidation of M@11[15.9949]	TCGA_BH-A18U_A2-A0YI_A2-A0EQ_117C_W_BI_20130405_H-JQ_f14:12231:2	2	2247.09	9.1529	2247.11	1124.55	12.8005	0.002997	BRCA
MYQPIQTYPWMNLSR	iTRAQ 4-plex of peptide N-term@0[144.1021];iTRAQ 4-plex of Y@2[144.1021];iTRAQ 4-plex of Y@8[144.1021]	TCGA_C8-A138_E2-A154_BH-A0BZ_117C_W_BI_20130225_H-PM_f17:30187:3	3	2359.21	4.27141	2359.22	787.41	12.6911	0.00899101	BRCA
MYQPIQTYPWMNLSR	iTRAQ 4-plex of peptide N-term@0[144.1021];iTRAQ 4-plex of Y@8[144.1021]	TCGA_AR-A0TV_C8-A12Z_AO-A0JJ_117C_W_BI_20130730_H-PM_f21:38288:3	3	2215.12	-0.896221	2215.12	739.38	12.6696	0.00599401	BRCA
MYQPIQTYPWMNLSR	iTRAQ 4-plex of peptide N-term@0[144.1021];Oxidation of M@1[15.9949];iTRAQ 4-plex of Y@8[144.1021]	TCGA_A2-A0T7_C8-A12Q_A8-A079_117C_W_BI_20130820_H-PM_f15:31729:2	2	2231.13	-6.43046	2231.11	1116.57	12.2852	0.002997	BRCA
MYQPIQTYPWMNLSR	iTRAQ 4-plex of peptide N-term@0[144.1021];Oxidation of M@1[15.9949]	TCGA_AO-A0JC_A8-A08Z_AR-A0TX_117C_W_BI_20130527_H-PM_f10:20350:4	4	2087.01	-0.889583	2087.01	522.76	12.2788	0.00699301	BRCA
MYQPIQTYPWMNLSR	iTRAQ 4-plex of peptide N-term@0[144.1021];iTRAQ 4-plex of Y@2[144.1021]	TCGA_A2-A0D0_BH-A0HK_C8-A12T_117C_W_BI_20130326_H-JQ_f24:6745:4	4	2215.13	-6.64018	2215.12	554.79	12.2643	0.00999001	BRCA
SGSLQGTTEPSMTHSIIASTSL	iTRAQ 4-plex of peptide N-term@0[144.1021]	TCGA_C8-A12P_BH-A0C1_A2-A0EY_117C_W_BI_20130622_H-PM_f04:35009:3	3	2348.17	-1.29073	2348.17	783.73	12.2377	0.00999001	BRCA
MYQPIQTYPWMNLSR	iTRAQ 4-plex of peptide N-term@0[144.1021]	TCGA_AO-A0JE_A2-A0T2_AN-A0AJ_117C_W_BI_20130802_H-PM_f16:5866:4	4	2071.01	1.55905	2071.01	518.76	12.1923	0.00699301	BRCA
MYQPIQTYPWMNLSR	iTRAQ 4-plex of peptide N-term@0[144.1021];iTRAQ 4-plex of Y@2[144.1021]	TCGA_BH-A0EE_AO-A0J9_BH-A0E0_117C_W_BI_20130412_H-PM_f01:6625:3	3	2215.12	-0.896221	2215.12	739.38	12.1443	0.003996	BRCA
